# Supplementary material
Source: Springer Nature journal article supplement (http://www.springermedizin.de/resource/supplementary/12891_2005_172_MOESM2_ESM.pdf/9510660)

Intra-rater reproducibility

Rating 1      Rating 2  
|  
First rater

mean      Inter-rater reproducibility

Inter-rater reproducibility

Intra-rater reproducibility

Rating 3      Rating 4  
|  
Second rater

mean

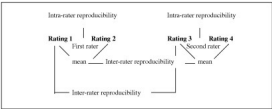

Supplement: MOESM2 [file 9510660]
